# Supplementary material for: Single-particle measurements and estimations of activity coefficients for semi-volatile organic compounds in organic aerosol of known chemical speciation
Source: Royal Society of Chemistry journal article supplement (doi:10.1039/d2ea00180b), 2023-01-01
Supplement: d2ea00180b1.pdf [file d2ea00180b1.pdf]

## Supplementary information

### Single-particle measurements and estimations of activity coefficients for semi-volatile organic compounds in organic aerosol of known chemical speciation

Thomas G. Hilditch<sup>1</sup>, Daniel A. Hardy<sup>1</sup>, Natasha J. Stevens<sup>2</sup>, Peter B. Glover<sup>2</sup>, and Jonathan P. Reid<sup>1</sup>

<sup>1</sup>School of Chemistry, University of Bristol, Bristol, UK, BS8 1TS

<sup>2</sup>Defence Science and Technology Laboratory, Porton Down, Salisbury, UK, SP4 0JQ

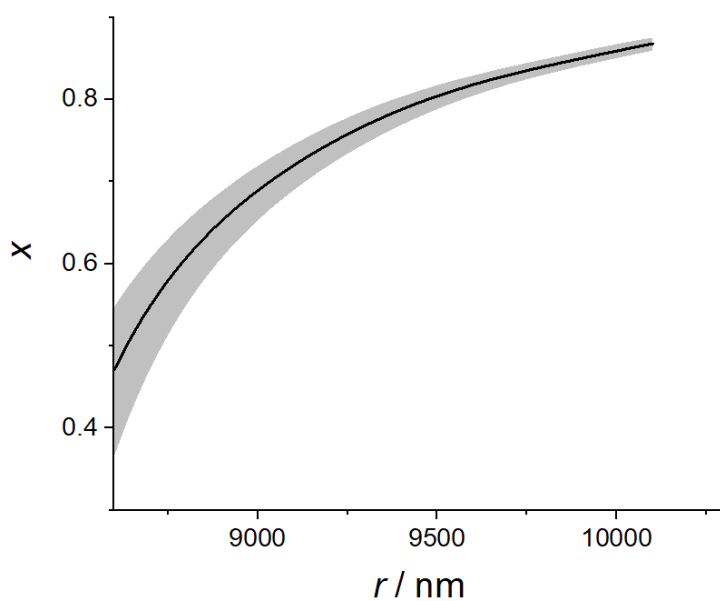

Figure S1 - Radius ( $r$ ) vs mole fraction ( $x$ ) for an evaporating droplet of T20/DEG described in the main text. The black line represents the simulated data from the model and grey shading represents the impact of a  $\pm 100$  nm uncertainty in the fitted optical  $r$  on the simulated  $x$ .

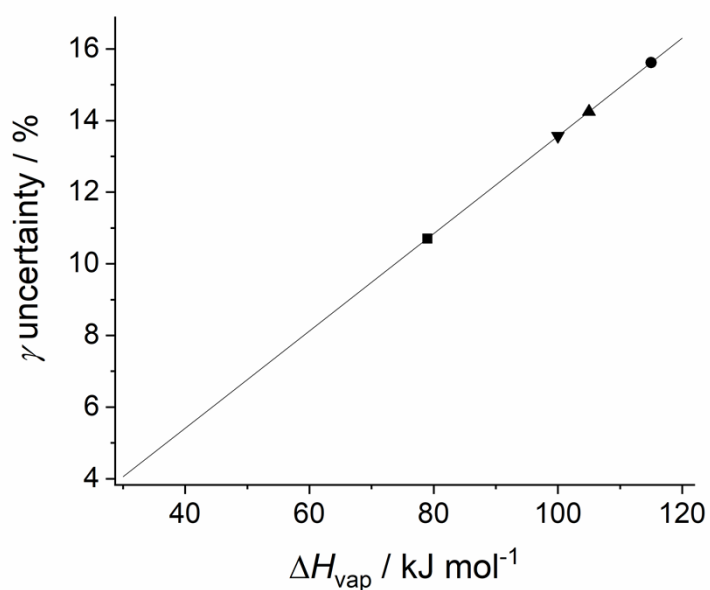

Figure S2 - Impact of a  $\pm 1$  K temperature uncertainty on the uncertainty of  $\gamma$  for a selection of DCAs of different  $\Delta H_{\text{vap}}$ , using literature values for  $\Delta H_{\text{vap}}$ . The DCAs are oxalic acid, square; malonic acid, circle; succinic acid, triangle and glutaric acid, inverted triangle. A straight line is drawn through the points to highlight the linear relationship.

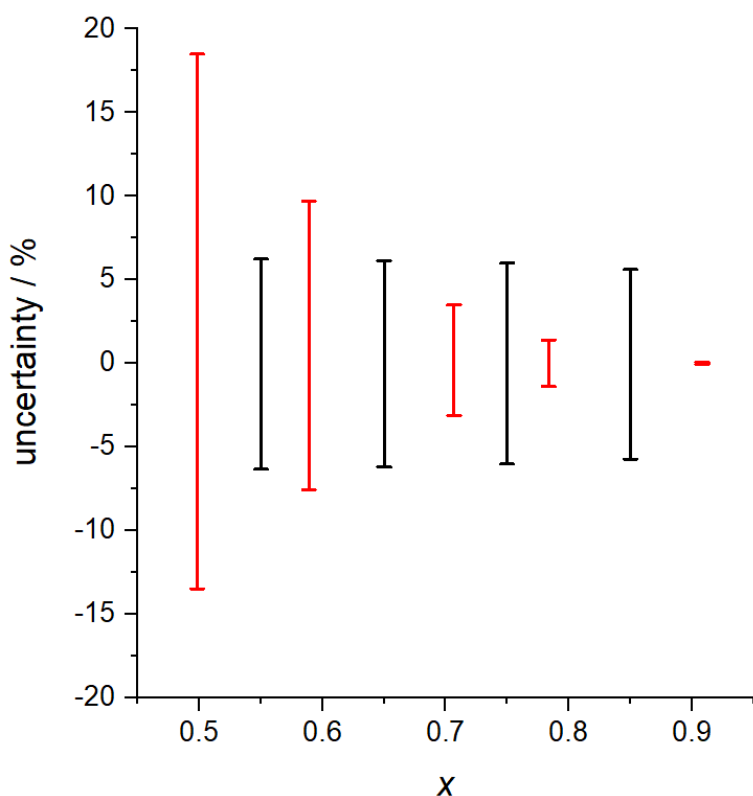

Figure S3- Modelled uncertainties of  $x$  (red) and  $\gamma$  (black) for a range of  $x$  for a droplet of T20/DEG, assuming a  $\pm 5$  % uncertainty in melt  $\rho_{\text{DEG}}$
